# Supplementary material for: Analytical and Clinical Validation of a Digital Sequencing Panel for Quantitative, Highly Accurate Evaluation of Cell-Free Circulating Tumor DNA
Source: PLoS One. 2015 Oct 16;10(10):e0140712. doi: 10.1371/journal.pone.0140712 (PMC4608804; doi:10.1371/journal.pone.0140712)
Supplement: S3 Table — The first worksheet compares cfDNA results against tissue NGS as the reference standard and the second worksheet compares tissue NGS against cfDNA NGS as the reference standard. Sensitivity, specificity and diagnostic accuracy with 95% confidence intervals are calculated for the eleven genes averaged together. Then the results using 2 x 2 tables for the entire 54-gene panel are calculated at bottom of each spreadsheet with 95% confidence intervals. (XLSX) [file pone.0140712.s005.xlsx]

## Sheet: tumor_truth
KRAS	Mutation Present	Mutation Absent	(tumor gDNA)			Sensitivity	Specificity	PPV	NPV	False Pos Rate	False Neg Rate	Diagnostic Accuracy
Test positive	23	2				0.884615	0.984615	0.92	0.977099	0.0153846	0.115385	0.967949
Test negative	3	128
(blood cfDNA)	26	130	156
			TND: 9
TP53	Mutation Present	Mutation Absent	(tumor gDNA)
Test positive	49	20				0.875	0.789474	0.710145	0.914634	0.210526	0.125	0.821192
Test negative	7	75
(blood cfDNA)	56	95	151
			TND: 14
BRAF	Mutation Present	Mutation Absent	(tumor gDNA)
Test positive	15	0				0.9375	1	1	0.992754	0	0.0625	0.993464
Test negative	1	137
(blood cfDNA)	16	137	153
			TND: 12
APC	Mutation Present	Mutation Absent	(tumor gDNA)
Test positive	33	0				0.846154	1	1	0.949153	0	0.153846	0.960265
Test negative	6	112
(blood cfDNA)	39	112	151
			TND: 14
PIK3CA	Mutation Present	Mutation Absent	(tumor gDNA)
Test positive	10	3				0.769231	0.979592	0.769231	0.979592	0.0204082	0.230769	0.9625
Test negative	3	144
(blood cfDNA)	13	147	160
			TND: 5
FBXW7	Mutation Present	Mutation Absent	(tumor gDNA)
Test positive	4	0				0.8	1	1	0.993631	0	0.2	0.993789
Test negative	1	156
(blood cfDNA)	5	156	161
			TND: 4
PTEN	Mutation Present	Mutation Absent	(tumor gDNA)
Test positive	3	0				1	1	1	1	0	0	1
Test negative	0	158
(blood cfDNA)	3	158	161
			TND: 4
CDKN2A	Mutation Present	Mutation Absent	(tumor gDNA)
Test positive	4	2				0.8	0.987342	0.666667	0.993631	0.0126582	0.2	0.981595
Test negative	1	156
(blood cfDNA)	5	158	163
			TND: 2
NRAS	Mutation Present	Mutation Absent	(tumor gDNA)
Test positive	4	1				1	0.993711	0.8	1	0.00628931	0	0.993865
Test negative	0	158
(blood cfDNA)	4	159	163
			TND: 2
ALK	Mutation Present	Mutation Absent	(tumor gDNA)
Test positive	1	1				0.5	0.993865	0.5	0.993865	0.00613497	0.5	0.987879
Test negative	1	162
(blood cfDNA)	2	163	165
			TND: 0
CTNNB1	Mutation Present	Mutation Absent	(tumor gDNA)
Test positive	2	1				1	0.993865	0.666667	1	0.00613497	0	0.993939
Test negative	0	162
(blood cfDNA)	2	163	165
			TND: 0
						Sensitivity	Specificity	PPV	NPV	False Pos Rate	False Neg Rate	Diagnostic Accuracy
						0.855682	0.974769	0.821155	0.981305	0.0252306	0.144318	0.968767	Mean (all genes)
						0.145142	0.0618443	0.174371	0.0267219	0.0618443	0.145142	0.0508876	SD (all genes)
						148	1548					1696
						171	1578					1749
						0.865497	0.980989					0.969697
					lower_CI	0.803	0.9726					0.9603
					upper_CI	0.9111	0.9869					0.977
All genes (n=54)	Mutation Present	Mutation Absent	(tumor gDNA)			FOR ALL GENES (n=54), number of tests=8,910 (165 x 54)
Test positive	159	38	197			0.850267	0.995644	0.807107	0.996786	0.0043563	0.149733	0.992593
Test negative	28	8685	8713			0.7892	0.9939					0.9905
(blood cfDNA)	187	8723	8910			0.8966	0.9968					0.9942
			8910

## Sheet: cfDNA_truth
KRAS	Mutation Present	Mutation Absent	(tumor gDNA)			Sensitivity	Specificity	PPV	NPV	False Pos Rate	False Neg Rate	Diagnostic Accuracy
Test positive	23	3				0.92	0.977099	0.884615	0.984615	0.0229008	0.08	0.967949
Test negative	2	128
(blood cfDNA)	25	131	156
			TND: 9
TP53	Mutation Present	Mutation Absent	(tumor gDNA)
Test positive	49	7				0.710145	0.914634	0.875	0.789474	0.0853659	0.289855	0.821192
Test negative	20	75
(blood cfDNA)	69	82	151
			TND: 14
BRAF	Mutation Present	Mutation Absent	(tumor gDNA)
Test positive	15	1				1	0.992754	0.9375	1	0.00724638	0	0.993464
Test negative	0	137
(blood cfDNA)	15	138	153
			TND: 12
APC	Mutation Present	Mutation Absent	(tumor gDNA)
Test positive	33	6				1	0.949153	0.846154	1	0.0508475	0	0.960265
Test negative	0	112
(blood cfDNA)	33	118	151
			TND: 14
PIK3CA	Mutation Present	Mutation Absent	(tumor gDNA)
Test positive	10	3				0.769231	0.979592	0.769231	0.979592	0.0204082	0.230769	0.9625
Test negative	3	144
(blood cfDNA)	13	147	160
			TND: 5
FBXW7	Mutation Present	Mutation Absent	(tumor gDNA)
Test positive	4	1				1	0.993631	0.8	1	0.00636943	0	0.993789
Test negative	0	156
(blood cfDNA)	4	157	161
			TND: 4
PTEN	Mutation Present	Mutation Absent	(tumor gDNA)
Test positive	3	0				1	1	1	1	0	0	1
Test negative	0	158
(blood cfDNA)	3	158	161
			TND: 4
CDKN2A	Mutation Present	Mutation Absent	(tumor gDNA)
Test positive	4	1				0.666667	0.993631	0.8	0.987342	0.00636943	0.333333	0.981595
Test negative	2	156
(blood cfDNA)	6	157	163
			TND: 2
NRAS	Mutation Present	Mutation Absent	(tumor gDNA)
Test positive	4	0				0.8	1	1	0.993711	0	0.2	0.993865
Test negative	1	158
(blood cfDNA)	5	158	163
			TND: 2
ALK	Mutation Present	Mutation Absent	(tumor gDNA)
Test positive	1	1				0.5	0.993865	0.5	0.993865	0.00613497	0.5	0.987879
Test negative	1	162
(blood cfDNA)	2	163	165
			TND: 0
CTNNB1	Mutation Present	Mutation Absent	(tumor gDNA)
Test positive	2	0				0.666667	1	1	0.993865	0	0.333333	0.993939
Test negative	1	162
(blood cfDNA)	3	162	165
			TND: 0
						Sensitivity	Specificity	PPV	NPV	False Pos Rate	False Neg Rate	Diagnostic Accuracy
						0.821155	0.981305	0.855682	0.974769	0.0186948	0.178845	0.968767
						0.174371	0.0267219	0.145142	0.0618443	0.0267219	0.174371	0.0508876
						148	1548					1696
						178	1571					1749
						0.831461	0.98536					0.969697
					lower_CI	0.7665	0.9778					0.9603
					upper_CI	0.8817	0.9905					0.977
All genes (n=54)	Mutation Present	Mutation Absent	(tumor gDNA)			FOR ALL GENES (n=54), number of tests=8,910 (165 x 54)
Test positive	159	28	187			0.807107	0.996786	0.850267	0.995644	0.00321359	0.192893	0.992593
Test negative	38	8685	8723			0.7436	0.9953					0.9905
(blood cfDNA)	197	8713	8910			0.8583	0.9978					0.9942
			8910
